# Supplementary material for: A plasmonic hetero-structure using charge transfer effect improved LSPR for enhanced up-conversion luminescence
Source: Royal Society of Chemistry journal article supplement (doi:10.1039/d3tc02081a), 2023-01-01
Supplement: d3tc02081a1.pdf [file d3tc02081a1.pdf]

## A plasmonic heterostructure using charge transfer effect improved LSPR for enhanced upconversion luminescence

### Supporting Information

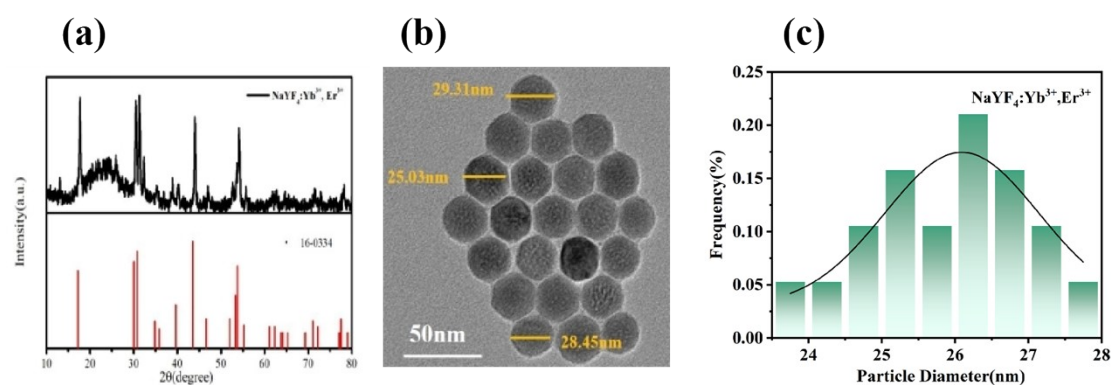

**Figure S1.** (a) XRD pattern of the as fabricated  $\text{NaYF}_4:\text{Yb}^{3+},\text{Er}^{3+}$ ; (b). TEM images of  $\text{NaYF}_4:\text{Yb}^{3+},\text{Er}^{3+}$ ; (c). Particle size distribution of  $\text{NaYF}_4:\text{Yb}^{3+},\text{Er}^{3+}$  nanoparticles

**Figure S1.** (a) shows the the diffraction peak position of the sample was highly matched with the standard card JCPDS:16-0334 of hexagonal phase  $\text{NaYF}_4$ . No other diffraction peaks or large angular shifts were observed, indicating that  $\text{Yb}^{3+}$  and  $\text{Er}^{3+}$  doping does not affect the crystal structure of the matrix material. **Figure S1.** (b) shows the transmission electron microscope image of  $\text{NaYF}_4:\text{Yb}-\text{Er}(30\%, 2\%)$  nanoparticles prepared by co-precipitation method. The average size of the sample was 26.6 nm with good dispersion **Figure S1.** (c). The sample was dried and the structure of the material phase was determined by X-ray diffraction. As shown in The sample prepared by co-precipitation method is pure phase, which is the basis for the subsequent experiments.

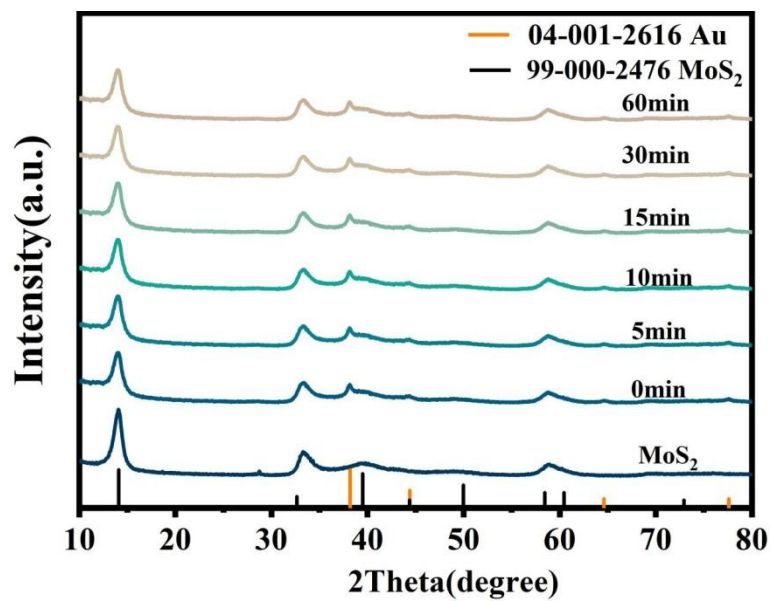

Figure S2. XRD pattern of the as fabricated Au/MoS<sub>2</sub> composite heterostructures

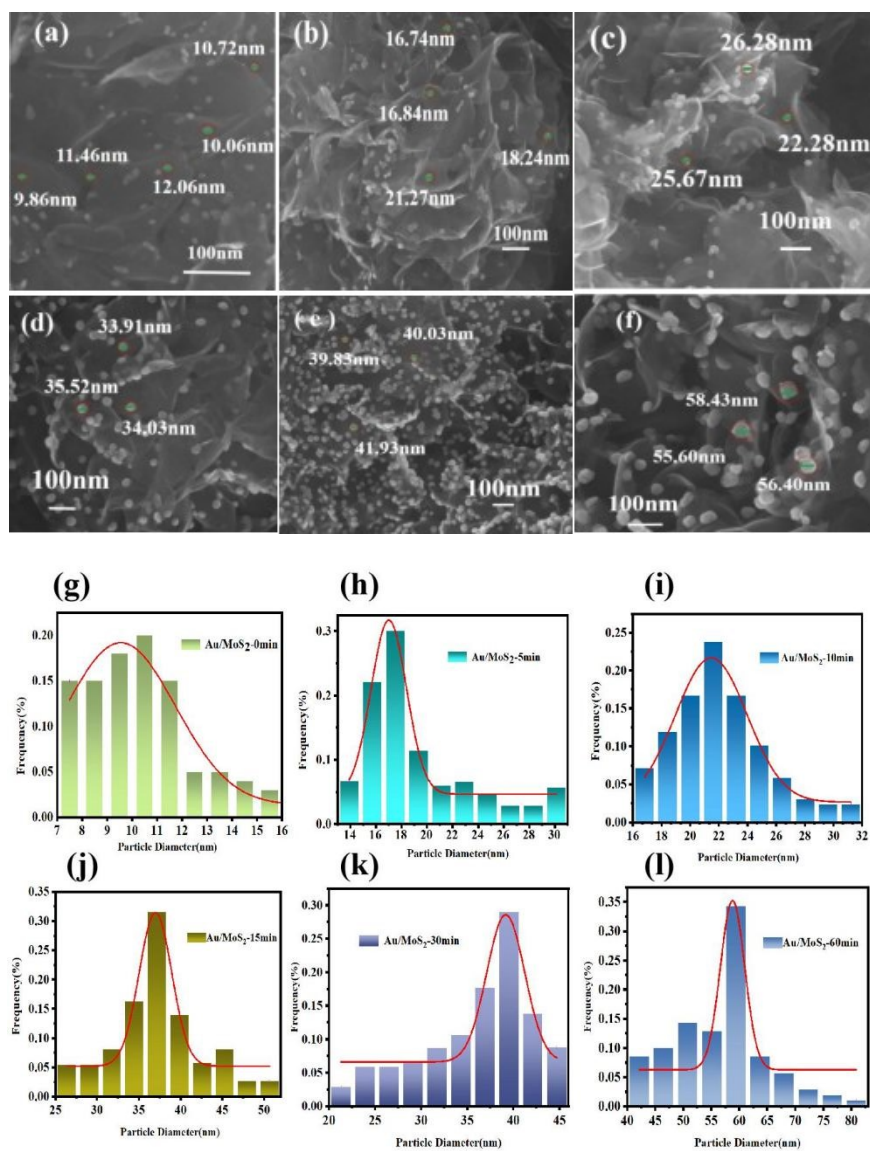

**Figure S3.** SEM micrograph of Au/MoS<sub>2</sub> Composite hetero-structures at different aging times (a) 0min; (b):5min; (c):10min; (d):15min; (e):30min; (f):60min. Particle size distribution of Au nanoparticles under different aging times (g) 0min; (h):5min; (i):10min; (j):15min; (k):30min; (l):60min.

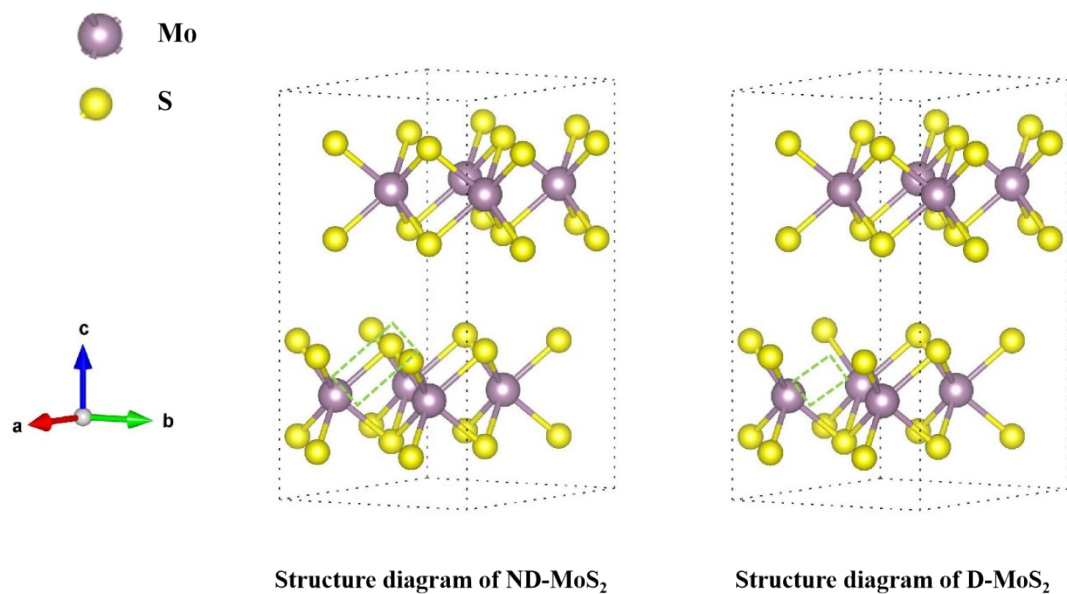

**Figure S4.** Schematic diagram of two types of MoS<sub>2</sub> structures introduced in DFT calculation

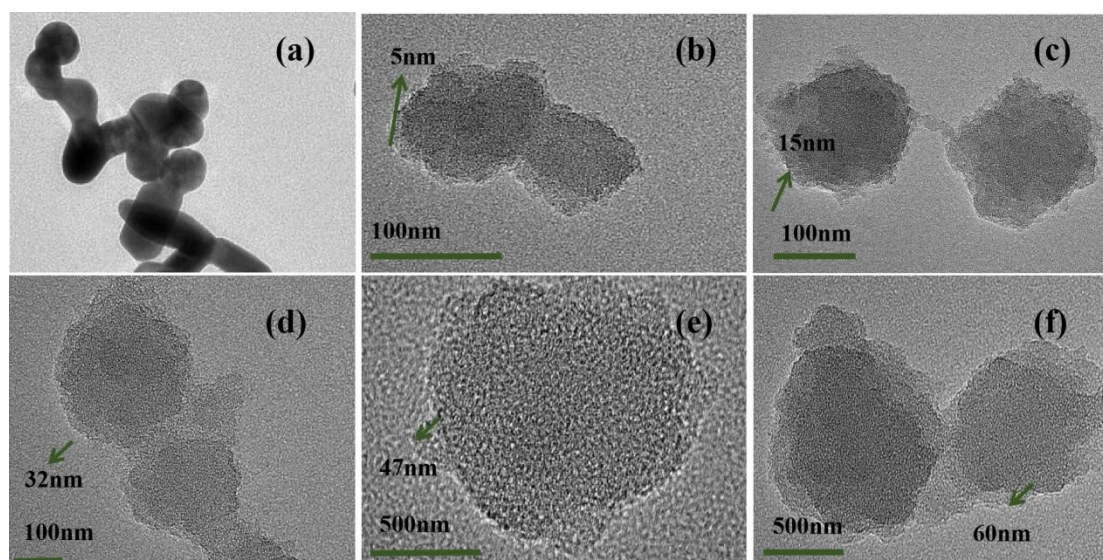

**Figure S5.** TEM image of Au; SiO<sub>2</sub> coated Au with different layer thickness b); 5nm; c): 15nm; d): 32nm; e): 47nm; f): 60nm

The D-MoS<sub>2</sub> and Au/D-MoS<sub>2</sub> composite heterostructures have a very pronounced thermal effect (Figure 4a-d). D-MoS<sub>2</sub>, Au/D-MoS<sub>2</sub> with different aging time were irradiated under laser, and the temperature of the spot irradiation region

increased rapidly. In the experiment, the temperature of Au/D-MoS<sub>2</sub> reaches 170 °C from room temperature in only 1 min under laser irradiation, and the temperature of MoS<sub>2</sub> rises to 70 °C under the same time irradiation.

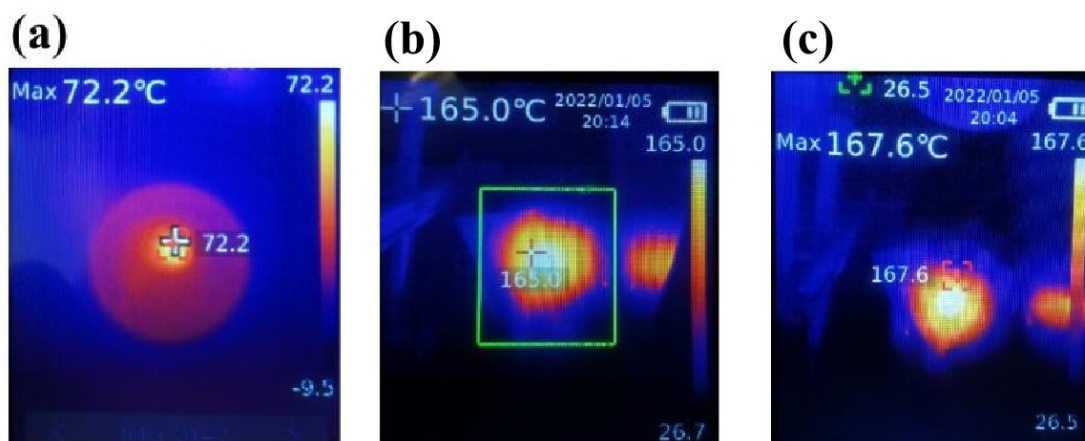

**Figure S6.** Imaging temperature of different samples irradiated by laser for 1 min recorded by thermal imager. (a) D-MoS<sub>2</sub>; (b) Au/MoS<sub>2</sub>-10min; (c) Au/MoS<sub>2</sub>-15min.
